# Supplementary material for: Fernblock Prevents Dermal Cell Damage Induced by Visible and Infrared A Radiation
Source: PubMed Central journal article supplement (PMC6121512; doi:10.3390/ijms19082250), 2018-08-01
Supplement: ijms-19-02250-s001.pdf [file ijms-19-02250-s001.pdf]

## SUPPLEMENTARY MATERIAL

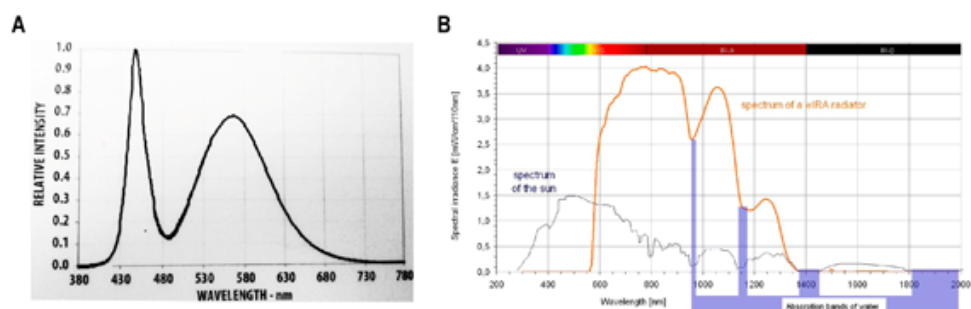

**Figure S1. Spectra of light sources.** Power and wavelength range of VIS (A) and wIRA (B) sources.

| Antigen                            | Origin              | Source             | Dilution |
|------------------------------------|---------------------|--------------------|----------|
| Matrix metalloproteinase 1 (MMP-1) | Rabbit (monoclonal) | Abcam®             | 1:100    |
| Cathepsin k                        | Rabbit (polyclonal) | Sigma®             | 1:100    |
| Fibrillin 2                        | Mouse (monoclonal)  | Novus biologicals® | 1:100    |
| Mouse IgG -Alexa 488               | Goat (polyclonal)   | Invitrogen®        | 1:250    |
| Rabbit IgG-Alexa 546               | Goat (monoclonal)   | Invitrogen®        | 1:250    |

**Table S1. Antibodies used for immunofluorescence.** Antigen, origin, source and working dilution of primary and secondary antibodies used to perform IF assays.

| Gen         | Species | Forward                  | Reverse                      |
|-------------|---------|--------------------------|------------------------------|
| MMP-1       | Human   | CATGAAAGGTGGACCAACAATTT  | CCAAGAGAATGGCCGAGTTC         |
| Cathepsin k | Human   | CTTTGCTCTGTACCCTGAGGAGAT | TGTTATATTGCTTCTCTGTGGG TCT T |
| Fibrillin 1 | Human   | TGACTGGCCACACGTGCATAG    | TGACATTGACCCCTTGTGACAGGA     |
| Fibrillin 2 | Human   | GGACATTGACGGATGTGA       | GATGCCGTTTCCAATCCA           |
| Elastin     | Human   | CTAAATACGGTGCTGCTGGC     | CATGGGATGGGGTTACAAAG         |

**Table S2. Sequences of primers used for mRNA analysis.** Gen, species and forward/reverse sequences.
